# Supplementary material for: Targeted siRNA Nanoparticles for Mammary Carcinoma Therapy
Source: PubMed Central journal article supplement (PMC6521050; doi:10.3390/cancers11040442), 2019-03-29
Supplement: cancers-11-00442-s001.pdf [file cancers-11-00442-s001.pdf]

## Supplementary Materials: Targeted siRNA Nanoparticles for Mammary Carcinoma Therapy

Meital Ben-David-Naim, Arie Dagan, ETTY Grad, Gil Aizik, Mirjam M. Nordling-David, Alisa Morss Clyne, Zvi Granot and Gershon Golomb

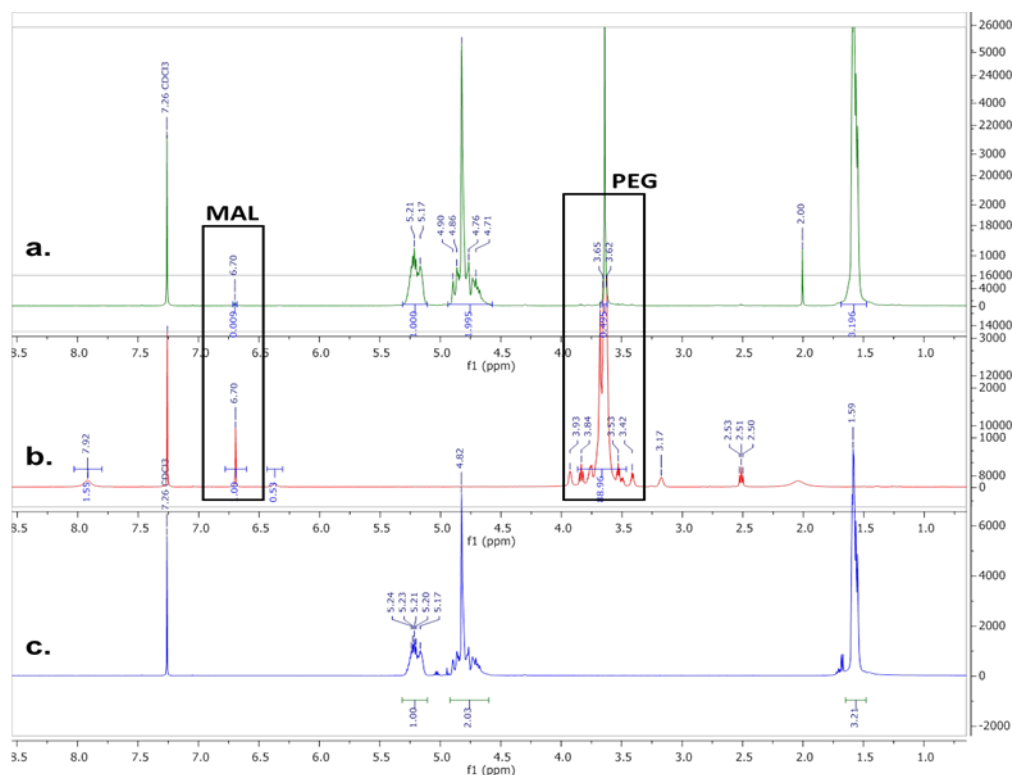

**Figure S1.** Confirmation of amine-PEG-maleimide (NH<sub>2</sub>-PEG-MAL) conjugation to PLGA by <sup>1</sup>H-NMR analysis. PLGA-PEG-MAL (a); NH<sub>2</sub>-PEG-MAL linker (b); PLGA (c).

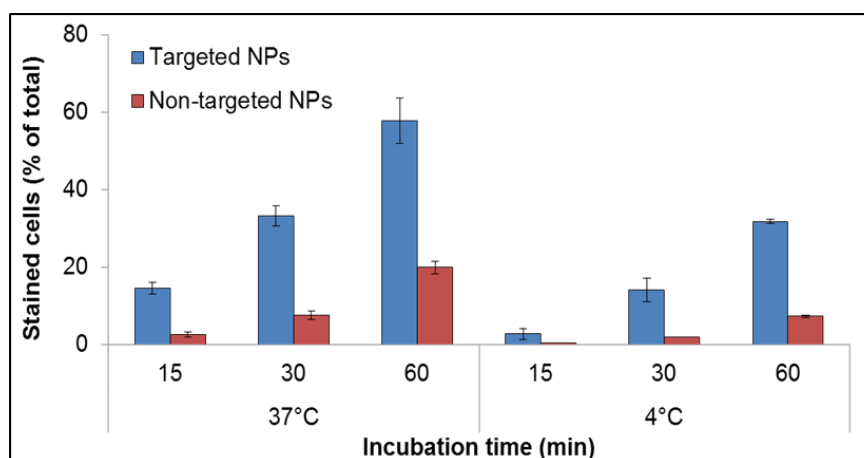

**Figure S2.** Temperature-dependent uptake of targeted and non-targeted NPs by MDA-MB-231 cell line. Cells were analyzed for internalized NPs by means of FACS. The fluorescent intensity was normalized to untreated cells. A total of 10,000 cells were counted in each measurement ( $n = 2$ ). Data is presented as the mean  $\pm$  SD; \*\*  $p < 0.01$  for all time-points (except for 15 min at 4 °C). The effect of lowering temperature on cellular uptake was more pronounced on non-targeted NPs uptake (6.2-, 3.8- and 2.7-fold, and 5.2-, 2.3- and 1.8-fold, after 15, 30 and 60 min, non-targeted NPs and targeted NPs, respectively).

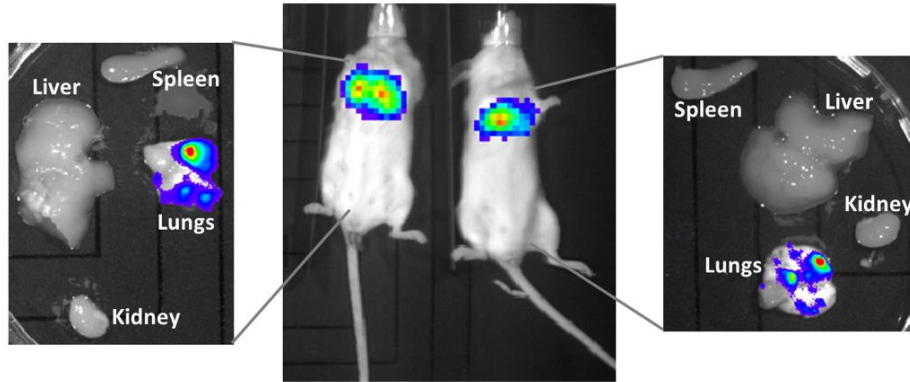

**Figure S3.** A representative image of the metastatic lungs in the 4T1 IV model. Two weeks after tail-vein injection of tumor cells, mice were injected intraperitoneally with D-luciferin and were imaged by an IVIS machine to confirm metastases formation. Metastases were formed exclusively in the lungs.

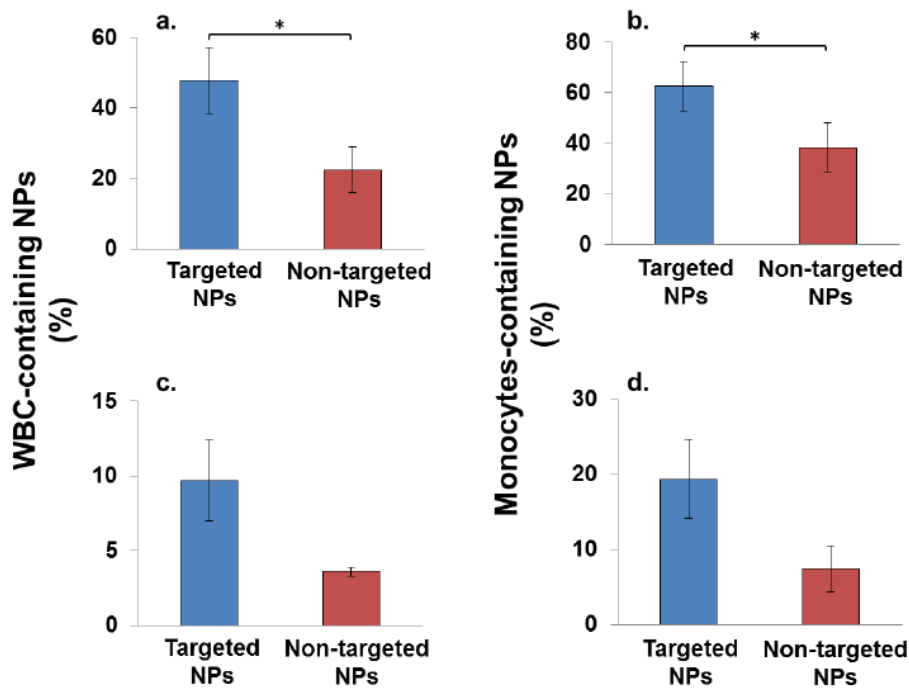

**Figure S4.** NPs uptake by circulating WBC and monocytes, examined in the 4T1 IV model (8 h after NPs injection; **a,b**) and in the mammary fat pad MDA-MD-231 xenograft model (24 h after NPs injection; **c,d**). Blood was collected and analyzed by means of FACS for cell associated NPs. The number of positively-stained cells for NPs is shown as percent of WBC and of monocytes- containing NPs. Data is presented as mean  $\pm$  SD ( $n = 4$  and  $n = 2$ , 4T1 IV model and MDA-MD-231 xenograft model, respectively; \*  $p < 0.05$ ).

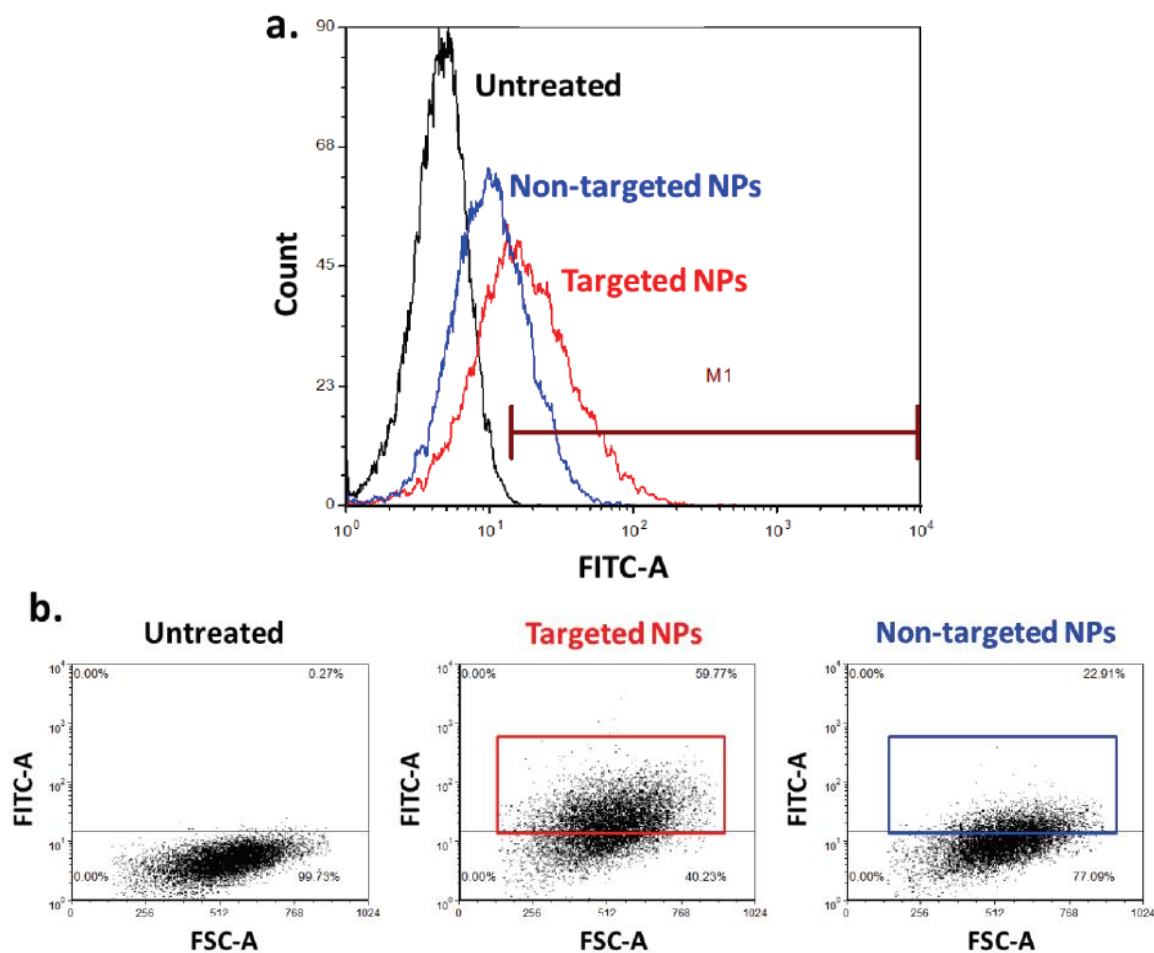

**Figure S5.** Cellular uptake of NPs by MDA-MB-231 cell line. Representative histograms (a) and dot-plots (b) obtained using FACS analyses. The data presented is of NPs' uptake following 1 h of incubation with the tumor cells.

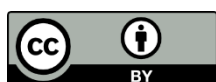

© 2019 by the authors. Licensee MDPI, Basel, Switzerland. This article is an open access article distributed under the terms and conditions of the Creative Commons Attribution (CC BY) license (<http://creativecommons.org/licenses/by/4.0/>).
